# Supplementary material for: Impaired Glycolysis Promotes Alcohol Exposure-Induced Apoptosis in HEI-OC1 Cells via Inhibition of EGFR Signaling
Source: MDPI journal article supplement (doi:10.3390/ijms21020476), 2020-01-11
Supplement: s1 [file s1]

## **Supplemental information**

**Impaired glycolysis promotes alcohol exposure-induced apoptosis  
in HEI-OC1 cells via inhibition of EGFR signaling.**

§ Hyunsook Kang <sup>1</sup>, § Seong Jun Choi <sup>1</sup>, Kye Hoon Park <sup>1</sup>, Chi-kyou Lee <sup>1\*</sup>, Jong-Seok Moon <sup>2\*</sup>

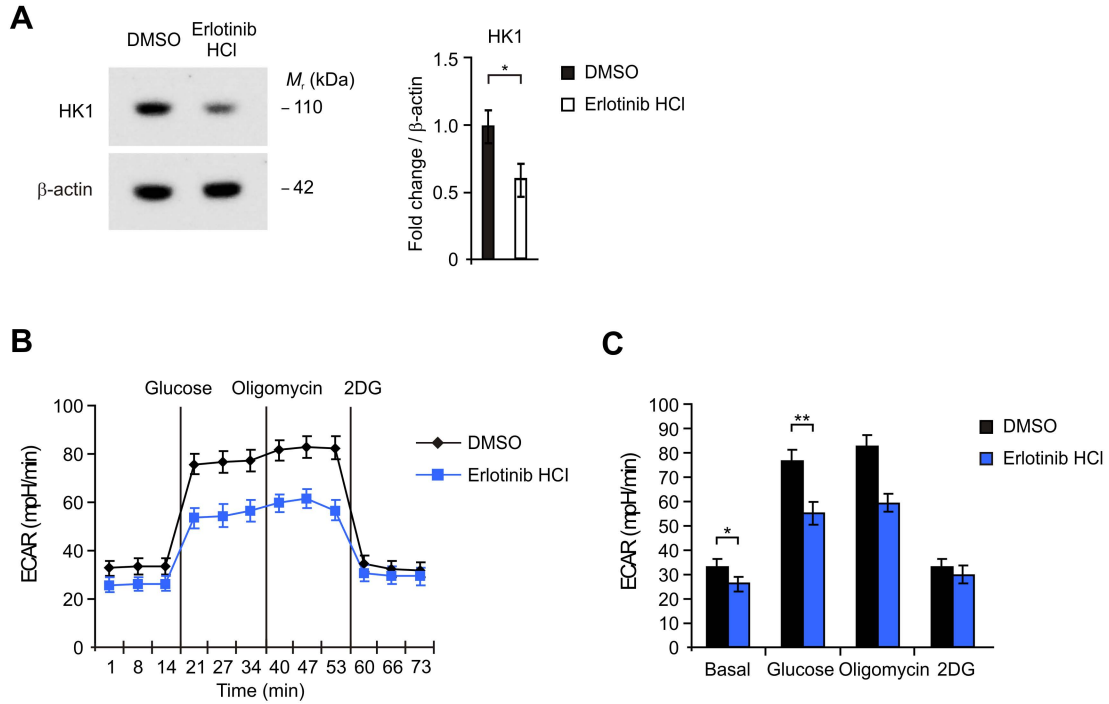

**Supplemental Figure S1. Inhibition of EGFR suppresses HK1-dependent glycolysis in HEI-OC1 cells.** (A) Representative immunoblot analysis for HK1 (right) and quantification for HK1 protein levels (left) from HEI-OC1 cells treated with Erlotinib HCl (Erlotinib, 1  $\mu$ M) or control (DMSO) for 4 h. For immunoblot,  $\beta$ -actin was used as loading control. Data representative of three independent experiments. Data are mean  $\pm$  SEM. \* $P$  < 0.05; by two-tailed student's t-test. (B) The levels of ECAR for glycolysis of glucose and (B) quantification of ECAR levels from HEI-OC1 cells treated with Erlotinib HCl (Erlotinib, 1  $\mu$ M) or control (DMSO) for 4 h. Data representative of three independent experiments. Data are mean  $\pm$  SEM. \* $P$  < 0.05; \*\* $P$  < 0.001 by two-tailed student's t-test.
